# Supplementary material for: Importance of the biofilm matrix for the erosion stability of Bacillus subtilis NCIB 3610 biofilms
Source: Royal Society of Chemistry journal article supplement (doi:10.1039/c9ra01955c), 2019-01-01
Supplement: c9ra01955c1.pdf [file c9ra01955c1.pdf]

## Supplementary Material for

**Title:** Importance of the biofilm matrix for the erosion stability of *Bacillus subtilis* NCIB 3610 biofilms

M. Klotz<sup>1</sup>, M. Kretschmer<sup>2</sup>, A. Goetz<sup>1</sup>, S. Ezendam<sup>1</sup>, O. Lieleg<sup>2</sup> and M. Opitz<sup>1+</sup>

## Affiliations

<sup>1</sup> Center for NanoScience, Faculty of Physics, Ludwig-Maximilians-Universität München, Munich, Germany

<sup>2</sup> Munich School of BioEngineering MSB and Department of Mechanical Engineering, Technische Universität München, Garching, Germany

+ corresponding author: [opitz@physik.uni-muenchen.de](mailto:opitz@physik.uni-muenchen.de).

## Supplementary Tables and Figures

### Supplementary Tables

**Table S1**

|                 |                                      |               |              |             |
|-----------------|--------------------------------------|---------------|--------------|-------------|
| Linear fit      | a+b x                                |               |              |             |
|                 | a                                    | b             |              |             |
| 3610            | 0 ± 0                                | 1.28 ± 0.03   |              |             |
| Sigmoidal fit   | base+{ max/(1+exp((xhalf-x)/rate) )} |               |              |             |
|                 | base                                 | max           | xhalf        | rate        |
| <i>tasA</i>     | 0 ± 0                                | 100 ± 0       | 18.31 ± 0.46 | 6.02 ± 0.41 |
| <i>bsIA</i>     | 0 ± 0                                | 100 ± 0       | 9.13 ± 0.26  | 2.09 ± 0.25 |
| Exponential fit | y0+A*exp(invTau*x)                   |               |              |             |
|                 | y0                                   | A             | invTau       |             |
| <i>epsA-O</i>   | 100 ± 0                              | -98.19 ± 2.94 | 0.15 ± 0.01  |             |

In this table, the fit parameter for Figure 1b are given. The wild-type strain shows a linear erosion kinetic. The mutants *tasA* and *bsIA* show a sigmoidal erosion kinetic. The mutant *epsA-O* shows an exponential erosion kinetic.

**Table S2**

|    | <i>tasA</i> | <i>bsIA</i> | <i>epsA-O</i> |
|----|-------------|-------------|---------------|
| wt | **          | **          | **            |

|                         | wt(Cipro) | <i>tasA</i> (Cipro) | <i>bsIA</i> (Cipro) | <i>epsA-O</i> (Cipro) |
|-------------------------|-----------|---------------------|---------------------|-----------------------|
| strain H <sub>2</sub> O | **        | n.s.                | *                   | n.s.                  |

**Significance of biofilm detachment in the absence and presence of the antibiotic ciprofloxacin.** Significance levels from high to low significance: \*\*  $\alpha=0.01$ , \*  $\alpha=0.05$  and not significant: n.s. Top: significance between wild-type and mutants in the

presence of ciprofloxacin. Bottom: significance between each strain in the absence of ciprofloxacin and in the presence of the antibiotic.

**Supplementary Figures**

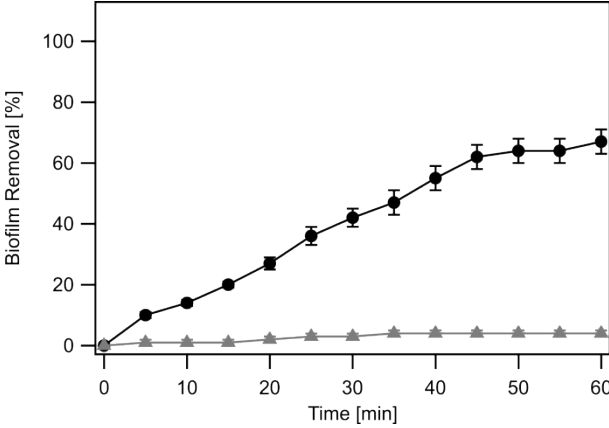

**Fig S1: BD630 erosion over time.** Biofilm detachment in water (black circles) and Fe<sup>3+</sup> solution (grey triangles).

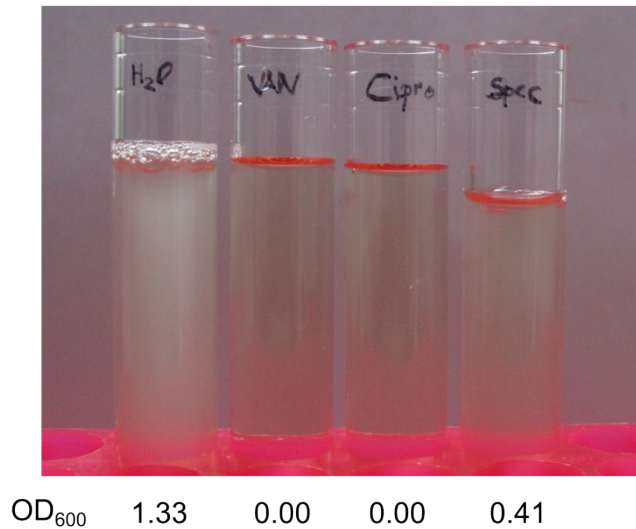

**Fig S2: Antibiotics tested in this study kill the bacteria in solution as long as no biofilm is formed.** Overnight cultures of NCIB 3610 in LB medium with water or antibiotic agent added in concentrations used for erosion experiments (from left to right: H<sub>2</sub>O, VAN: 0.75μg/ml; Cipro: 64μg/ml; Spec: 0.25μg/ml).

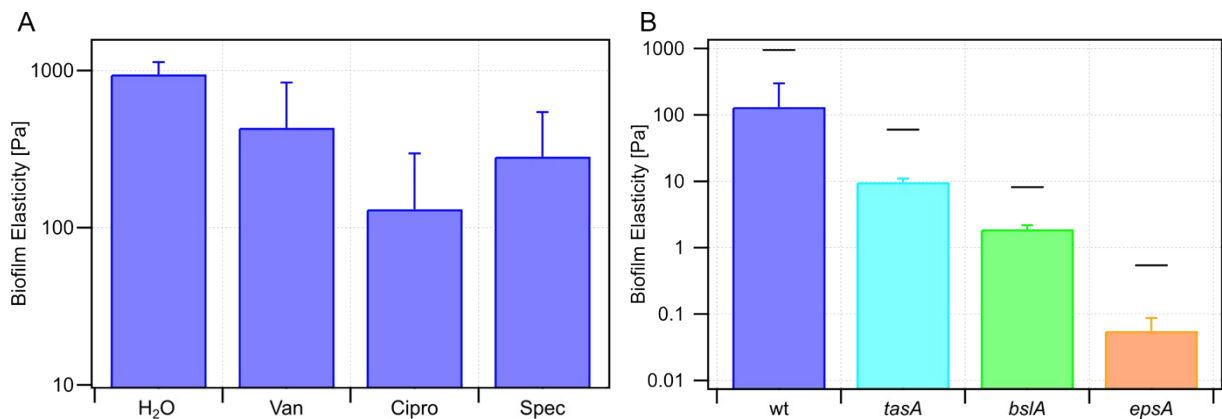

**Fig S3: Stiffness of biofilms does not change significantly with antibiotic treatment.** A) Storage modulus of NCIB 3610 treated with water and 3 antibiotics. B) Storage modulus of NCIB 3610 wildtype and mutants treated with ciprofloxacin. Black lines indicate corresponding treatment values of elasticity measured in water.
