# Supplementary material for: Importance of the biofilm matrix for the erosion stability of Bacillus subtilis NCIB 3610 biofilms
Source: Royal Society of Chemistry journal article supplement (doi:10.1039/c9ra01955c), 2019-01-01
Supplement: c9ra01955c2.xlsx [file c9ra01955c2.xlsx]

## Sheet: Fig1B
	Mean Erosion [%]					SEM Erosion [%]
Time [min]	3610	tasA	bslA	epsA		3610	tasA	bslA	epsA
0	0	0	0	0		0.5	0	0	0
5	8.5	6.4	8.5	60.6		1.3	0.1	1.3	7.5
10	14.3	17.8	63.6	75.7		2	1.2	4.1	6.9
15	18.8	38.1	87.9	83.6		2.9	2.5	1.9	6.2
20	31.8	63.6	92.7	97		3.5	2.4	1.3	1.9
25	34.7	72.9	97.5	97		3.6	2.3	0.3	1.9
30	36.6	83.7	100	97.7		3.8	1.3	0	1.8
35	43.5	89.9	100	100		3.9	0.8	0	0
40	49.2	96.2	100	100		3.8	0.3	0	0
45	58.3	98.3	100	100		3.7	0.1	0	0
50	66.1	100	100	100		3.5	0	0	0
55	66.4	100	100	100		2.7	0	0	0
60	78.3	100	100	100		1.7	0	0	0
Fitparameters
Linear fit	a+b⋅x
	a	b
3610	0 ± 0	1.28 ± 0.03
Sigmoidal fit	base+{ max/(1+exp⁡((xhalf-x)/rate) )}
	base	max	xhalf	rate
tasA	0 ± 0	100 ± 0	18.31 ± 0.46	6.02 ± 0.41
bslA	0 ± 0	100 ± 0	9.13 ± 0.26	2.09 ± 0.25
Exponential fit	y0+A*exp(invTau*x)
	y0	A	invTau
epsA	100 ± 0	-98.19 ± 2.94	0.15 ± 0.01

## Sheet: Fig1C
		50% Detachment Time
		Mean	±	SEM
	wildtype	31.59	±	3.92
	tasA	22.26	±	1.69
	bslA	12.5	±	1.02
	epsA	9.11	±	1.34

## Sheet: Fig2A
		Wetting Angle [°]
		Mean	±	SEM
	wildtype	129.06	±	1.39
	tasA	20.35	±	0.59
	tasA 0min	131.9	±	1.3
	bslA	16.89	±	1.62
	epsA	22.73	±	0.65

## Sheet: Fig2B
		Normalized Biofilm Elasticity [%]
		Mean	±	Sdev
	wildtype	85.8	±	17
	tasA	50.7	±	57.6
	bslA	1.9	±	1.74
	epsA	0.159	±	0.233

## Sheet: Fig3A
	Biofilm Removal [%]
Treatment	3610	tasA	bslA	epsA
H2O	78.3	100	100	100
Fe	2.3	3.9	0	0
Cu	5	34	0	6.6
Ca	43.2	100	55.6	32.7
Na	17.5	95.3	26.7	100
	SEM Biofilm Removal [%]
Treatment	3610	tasA	bslA	epsA
H2O	2.5	0	0	0
Fe	0.1	0.2	0	0
Cu	0.1	2.3	0.2	0.7
Ca	3.4	0	3.7	3.6
Na	2.1	0.6	3.7	0

## Sheet: Fig3B
	Biofilm Elasticity [Pa]
Treatment	3610	tasA	bslA	epsA
H2O	943	59.6	8.15	0.543
Fe	100000	260000	132000	167000
Cu	1840	692	57	42.2
Ca	764	34.3	9.21	0.829
Na	843	30.9	4.27	0.109
	Sdev Biofilm Elasticity [Pa]
Treatment	3610	tasA	bslA	epsA
H2O	187	67.7	7.35	0.794
Fe	50900	18200	90300	90600
Cu	1390	668	4.52	4.48
Ca	186	19.9	5.59	0.521
Na	579	9.35	2.1	0.0479

## Sheet: Fig4
		pH dependent
		BiofilmRemoval[%]
		Mean	±	SEM	pH value
	Fe	2	±	1	2
	Glycine	9	±	3	3
	Acetate	35	±	3	3.6
	Cu	5	±	0	4.5
	Ca	43	±	4	6
	Na	17	±	2	7
	H2O	78	±	3	7

## Sheet: Fig5A
		3610 wt
		Biofilm Removal [%]
		Mean	±	Sdev
	H2O	79.41	±	2.69
	Van	67.43	±	3.57
	Cipro	46.51	±	3.9
	Spec	71.54	±	3.28

## Sheet: Fig5B
		Biofilm Removal [%]
		Ciprofloxacin			Water
		Mean	±	SEM	Mean
	wildtype	46.51	±	3.9	78.3
	tasA	100	±	0	100
	bslA	77.83	±	2.96	100
	epsA	100	±	0	100

## Sheet: SFig1
	Biofilm Removal [%]
	BD630 Water			BD630 Fe
Time [min]	Mean	±	SEM	Mean	±	SEM
0	0	±	0	0	±	0
5	10	±	1	6	±	1
10	14	±	1	7	±	1
15	20	±	1	7	±	1
20	27	±	2	7	±	1
25	36	±	3	7	±	1
30	42	±	3	7	±	1
35	47	±	4	7	±	1
40	55	±	4	7	±	1
45	62	±	4	7	±	1
50	64	±	4	7	±	1
55	64	±	4	7	±	1
60	67	±	4	7	±	1

[truncated: 2 more sheets: SFig3A, SFig3B]
